# Supplementary material
Source: MDPI journal article supplement (https://www.mdpi.com/2039-4349/13/5/70)
Supplement: s1 [file s1]

| Author                    | Title                                                                                | Publication year | State         | Study design  | N° of patients | Age       | Disease                   | Group of patients                                              | Cochlear Implant | Objective                                                                                                                       | OTOPLAN analysis                                                                                                             | Outcome analyzed                                                                                                                                                                                | Results                                                                                                                                                                                                                                                                                  |
|---------------------------|--------------------------------------------------------------------------------------|------------------|---------------|---------------|----------------|-----------|---------------------------|----------------------------------------------------------------|------------------|---------------------------------------------------------------------------------------------------------------------------------|------------------------------------------------------------------------------------------------------------------------------|-------------------------------------------------------------------------------------------------------------------------------------------------------------------------------------------------|------------------------------------------------------------------------------------------------------------------------------------------------------------------------------------------------------------------------------------------------------------------------------------------|
| Lovato <i>et al.</i> [40] | OTOPLAN in Cochlear Implantation for Far-advanced Otosclerosis                       | 2020             | Europe, Italy | Retrospective | 13             | mean 59.6 | Far-advanced otosclerosis | OTOPLAN group: 5 pz<br>Historical group (only CT pre-op): 8 pz | Unilateral       | To preliminarily evaluate the potential role of OTOPLAN for electrode length choice, or to predict surgical difficulties in FAO | Cochlear duct length: mean 32,4 mm<br>Ossification/fibrosis of the cochlear duct: 2/5<br>Round window (RW) ossification: 2/5 | Surgical difficulties: RW ossification; incomplete array insertion<br>Adverse effects: facial palsy/stimulation; vertigo<br>Speech recognition threshold (SRT)<br>Words recognition score (WRS) | The audiological outcome of the OTOPLAN group was slightly superior compared with historical group. CT was not able to predict surgical difficulties; OTOPLAN was able to identify preoperatively RW niche ossification. No incomplete array insertion in OTOPLAN group; 25% in CT group |
| Ricci <i>et al.</i> [41]  | OTOPLAN, Cochlear Implant, and Far-Advanced Otosclerosis : Could the Use of Software | 2022             | Europe, Italy | Case report   | 1              | 73        | Far-advanced otosclerosis | /                                                              | Unilateral       | Case of FAO with destruction of cochlear turns: OTOPLAN used to plan the surgery, identify the                                  | Diameter, Height, Width, CDL of the cochlea<br>Ossification/fibrosis of the CD<br>Ossification of the RW                     | Verification of successful insertion of electrode: intraoperative radioscopy and post-operative CT                                                                                              | Successfully implanted a severe case of FAO with several perforation of the cochlea.                                                                                                                                                                                                     |

|                           |                                                                                                                                  |      |               |               |    |      |                                              |   |            |                                                                                                                                                                                         |                                                               |                                                           |                                                                                                                                                                                                      |
|---------------------------|----------------------------------------------------------------------------------------------------------------------------------|------|---------------|---------------|----|------|----------------------------------------------|---|------------|-----------------------------------------------------------------------------------------------------------------------------------------------------------------------------------------|---------------------------------------------------------------|-----------------------------------------------------------|------------------------------------------------------------------------------------------------------------------------------------------------------------------------------------------------------|
|                           | Improve the Surgical Final Indication?                                                                                           |      |               |               |    |      |                                              |   |            | best electrode and check the correct position of the CI in the cochlear duct                                                                                                            | Osteolytic areas                                              | Intraoperative telemetry                                  |                                                                                                                                                                                                      |
| Lovato <i>et al.</i> [39] | Utility of OTOPLAN Reconstructed Images for Surgical Planning of Cochlear Implantation in a Case of Post-meningitis Ossification | 2019 | Europe, Italy | Case report   | 1  | 46   | Post-meningitis is HLe cochlear ossification | / | Bilateral  | To demonstrate the use of OTOPLAN for pre-operative surgical planning in a case where as according to CT surgery was contraindicated                                                    | Ossification of the RW<br>Ossification of the CD<br>CDL       | Completed array insertion<br>Intraoperative telemetry     | Successfully implanted. OTOPLAN may be useful in difficult CI case as cochlear ossification and anatomic abnormalities                                                                               |
| Hajr <i>et al.</i> [42]   | Cochlear Implantation: The use of OTOPLAN Reconstructed Images in Trajectory Identification                                      | 2023 | Saudi Arabia  | Retrospective | 25 | 1-50 | /                                            | / | Unilateral | To define the best electrode trajectory line in cochlear implant surgery by using OTOPLAN. To investigate the feasibility of the retro-facial approach as a direct access to the RW and | Cochlear view and other ear structures.<br>Facial recess size | Ideal trajectory line<br>Size of the retrofacial approach | The retro-facial approach represented the best trajectory line. OTOPLAN-reconstructed imaging provided a useful analysis of the retro-facial approach and helped in planning the surgical trajectory |

|                             |                                                                                                 |      |               |                            |             |                             |                      |                                         |               |                                                                                                               |                                                                                                               |                                                                                                                            |                                                                                                                                                                           |
|-----------------------------|-------------------------------------------------------------------------------------------------|------|---------------|----------------------------|-------------|-----------------------------|----------------------|-----------------------------------------|---------------|---------------------------------------------------------------------------------------------------------------|---------------------------------------------------------------------------------------------------------------|----------------------------------------------------------------------------------------------------------------------------|---------------------------------------------------------------------------------------------------------------------------------------------------------------------------|
|                             |                                                                                                 |      |               |                            |             |                             |                      |                                         |               | to classify the size of the retro-facial approach in relation to the size of the facial recess.               |                                                                                                               |                                                                                                                            | line toward the RW. Additionally can help the surgeon to compare the retro-facial approach to the standard facial recess.                                                 |
| Di Maro <i>et al.</i> [52]  | Frequency reallocation based on cochlear place frequencies in cochlear implants: a pilot study  | 2022 | Europe, Italy | Retrospective/ Pilot study | 10          | >14 (range 14.3–78.7 years) | Postlingual deafness | Pre e post frequency reallocation       | Unilateral    | to demonstrate that an anatomically based frequency reallocation can provide immediate benefit to the patient | Array insertion depth<br>Cochlear place of stimulation                                                        | Subjective sensations<br>PTA, SAT and SRT thresholds<br>Correlation between depth of insertion and audiological thresholds | The mean values of SRT and SAT were significantly lower. No significant differences in PTA. OTOPLAN may be used in anatomic mapping for subsequent frequency reallocation |
| Khurayzi <i>et al.</i> [19] | Direct measurement of cochlear parameters for automatic calculation of the cochlear duct length | 2020 | Saudi Arabia  | Retrospective              | 88 cochleas | <7                          | Prelingual deafness  | CT measurements<br>OTOPLAN measurements | Uni/Bilateral | Validation of OTOPLAN and CDL estimation                                                                      | Cochlear diameter (A-value)<br>Width of the cochlear base (B-value)<br>Height of the cochlea (H-value)<br>CDL | A-value, B-value, H-value and CDL                                                                                          | No difference in A-value between CT and OTOPLAN<br>Both A- and B- values showed a high positive correlation to the CDL,                                                   |

|                       |                                                                                                      |      |                 |                  |     |          |   |   |               |                                                                                                                                                   |                                                                                                                                                  |                                                                                                                                                  |                                                                                                                                                                                                  |
|-----------------------|------------------------------------------------------------------------------------------------------|------|-----------------|------------------|-----|----------|---|---|---------------|---------------------------------------------------------------------------------------------------------------------------------------------------|--------------------------------------------------------------------------------------------------------------------------------------------------|--------------------------------------------------------------------------------------------------------------------------------------------------|--------------------------------------------------------------------------------------------------------------------------------------------------------------------------------------------------|
|                       |                                                                                                      |      |                 |                  |     |          |   |   |               |                                                                                                                                                   |                                                                                                                                                  |                                                                                                                                                  | stronger between B-value and CDL than A-value and CDL.                                                                                                                                           |
| Dahanasing et al.[44] | The rationale for FLEX (cochlear implant) electrode array with varying array lengths                 | 2021 | Europe, Austria | Narrative review | /   | /        | / | / | /             | Rationale of FLEX electrode array and the use of otological pre-planning software tool like OTOPLAN                                               | /                                                                                                                                                | /                                                                                                                                                | OTOPLAN offers the possibility in measuring the the cochlear size, choosing the best fitting electrode array .                                                                                   |
| Spiegel et al.[23]    | Variation of the cochlear anatomy and cochlea duct length: analysis with a new tablet-based software | 2022 | Europe, Germany | Retrospective    | 108 | 6,5-90,3 | / | / | Uni/Bilateral | To evaluate the range of CDL, find differences in different patient groups and to assess the angular insertion depth )AID) for cochlear coverage. | Cochlear diameter (A-value)<br>Width of the cochlear base (B-value)<br>Height of the cochlea (H-value)<br>CDL<br>AID<br>Cochlear place frequency | Cochlear diameter (A-value)<br>Width of the cochlear base (B-value)<br>Height of the cochlea (H-value)<br>CDL<br>AID<br>Cochlear place frequency | Significant difference of mean CDL with regards to sex, but not to age, side or patients having received different types of CI-electrodes. Significant differences in AID and cochlear coverage. |

|                                 |                                                                                                |      |                          |                            |             |                         |                                                    |                               |               |                                                                                                                                                                                                                         |                                                                                                                             |                                                                                                                             |                                                                                                                                                                                                                                                                                                                                                |
|---------------------------------|------------------------------------------------------------------------------------------------|------|--------------------------|----------------------------|-------------|-------------------------|----------------------------------------------------|-------------------------------|---------------|-------------------------------------------------------------------------------------------------------------------------------------------------------------------------------------------------------------------------|-----------------------------------------------------------------------------------------------------------------------------|-----------------------------------------------------------------------------------------------------------------------------|------------------------------------------------------------------------------------------------------------------------------------------------------------------------------------------------------------------------------------------------------------------------------------------------------------------------------------------------|
| Alahmadi <i>et al.</i> [33]     | Cochlear Implantation: The Volumetric Measurement of Vestibular Aqueduct and Gusher Prediction | 2023 | Saudi Arabia             | Retrospective chart review | 21          | mean 13,81 (+- 5,10)    | Mondini dysplasia and enlarged vestibular aqueduct | /                             | Uni/Bilateral | To validate the role of 3D segmentation in measuring the volume of the vestibular aqueduct, and the inner ear and to study the correlation between VAD volume and VAD linear measurements at the midpoint and operculum | Cochlear diameter (A-value)<br>Width of the cochlear base (B-value)<br>Height of the cochlea (H-value)<br>CDL<br>VAD widths | Cochlear diameter (A-value)<br>Width of the cochlear base (B-value)<br>Height of the cochlea (H-value)<br>CDL<br>VAD widths | Age, H-value, VAD at the midpoint and VAD at the operculum were significant predictors for CT VAD volume. Sex, age, A-value, and VAD at the operculum can be used as significant predictors for Ctiner ear volume using data from both ears. Patients gusher outcomes were significantly differentiated by sex and VAD length at the midpoint. |
| George-Jones <i>et al.</i> [24] | Comparing Cochlear Duct Lengths Between CT and MR Images                                       | 2020 | United States of America | Retrospective              | 27 cochleas | adult (unspecified age) | Postlingual deafness                               | CDL using CT and CDL using MR | Uni/Bilateral | To examine the intra- and interobserver variability in measuring the CDL                                                                                                                                                | CDL                                                                                                                         | CDL                                                                                                                         | No difference between MRI and CT: MRI images can be used in OTOPLAN                                                                                                                                                                                                                                                                            |

|                               |                                                                                                                             |      |                          |               |                     |                         |                                          |   |               |                                                                                                                                                                                                             |                                                                                                               |                                                                                                               |                                                                                                                                                                                             |
|-------------------------------|-----------------------------------------------------------------------------------------------------------------------------|------|--------------------------|---------------|---------------------|-------------------------|------------------------------------------|---|---------------|-------------------------------------------------------------------------------------------------------------------------------------------------------------------------------------------------------------|---------------------------------------------------------------------------------------------------------------|---------------------------------------------------------------------------------------------------------------|---------------------------------------------------------------------------------------------------------------------------------------------------------------------------------------------|
|                               | Using an Otological Surgical Planning Software                                                                              |      |                          |               |                     |                         |                                          |   |               | from MRI images vs CT images using the OTOPLAN                                                                                                                                                              |                                                                                                               |                                                                                                               | as CT images.                                                                                                                                                                               |
| Canfarotta <i>et al.</i> [22] | Validating a new tablet-based tool in the determination of cochlear implant angular insertion depth                         | 2019 | United States of America | Retrospective | 36 cochleas (20 pz) | adult (unspecified age) | Postlingual deafness                     | / | Uni/Bilateral | To evaluate the intra- and inter-rater reliability of this tool in determining AID and CDL. To assess the resultant variability in estimates of the cochlear place frequency for the most apical electrode. | AID<br>CDL<br>Estimate cochlear place frequency for each electrode                                            | AID<br>CDL<br>Estimate cochlear place frequency for each electrode                                            | Excellent inter- and inter-rater reliability of both AID and CDL: OTOPLAN can be used to reliably determine electrode location to inform image-guided mapping strategies for CI recipients. |
| Bahavana <i>et al.</i> [53]   | OTOPLAN-Based Study of Intracochlear Electrode Position Through Cochleostomy and Round Window in Transcanal Veria Technique | 2022 | India                    | Retrospective | 26                  | 2-15                    | Prelingual deafness; severe bilateral HL | / | Uni/Bilateral | To study the postoperative visualisation of the electrode array insertion angle through transcanal Veria approach in both round window and cochleostomy techniques                                          | Cochlear diameter (A-value)<br>Height of the cochlea (H-value)<br>Width of the cochlear base (B-value)<br>CDL | Cochlear diameter (A-value)<br>Height of the cochlea (H-value)<br>Width of the cochlear base (B-value)<br>CDL | No significant difference in average angle of insertion depth between subjects with cochleostomy and round window insertion. No difference between round                                    |

|                              |                                                                                                           |      |                          |               |                      |            |   |   |               |                                                                                                                                                                         |                                                                            |                                                                            |                                                                                                                                                                                                                                                                                     |
|------------------------------|-----------------------------------------------------------------------------------------------------------|------|--------------------------|---------------|----------------------|------------|---|---|---------------|-------------------------------------------------------------------------------------------------------------------------------------------------------------------------|----------------------------------------------------------------------------|----------------------------------------------------------------------------|-------------------------------------------------------------------------------------------------------------------------------------------------------------------------------------------------------------------------------------------------------------------------------------|
|                              |                                                                                                           |      |                          |               |                      |            |   |   |               |                                                                                                                                                                         |                                                                            |                                                                            | window insertion or cochleostomy insertion when it comes to electrode array position and placement in the scala tympani.                                                                                                                                                            |
| Cooperman <i>et al.</i> [14] | Assessment of Inter- and Intra-Rater Reliability of Tablet-Based Software to Measure Cochlear Duct Length | 2021 | United States of America | Retrospective | 166 cochlear (83 pz) | mean 65.63 | / | / | Uni/Bilateral | To examine whether increased CT slice thickness was associated with increased variability of CDL measurements. To assess the strong inter- and intra-rater reliability. | Cochlear diameter (A-value)<br>Width of the cochlear base (B-value)<br>CDL | Cochlear diameter (A-value)<br>Width of the cochlear base (B-value)<br>CDL | No significant relationship between slice thickness and CDL measurement. There is inter- and intra-rater reliability for cochlear diameter, width, and duct length measured with OTOPLAN. The software may have clinical utility for selecting appropriate electrode array lengths. |

|                             |                                                                                                                                   |      |                |               |                      |          |                       |                                                                       |               |                                                                                                                                                                                                      |                                                                                                                                                                          |                                                                                                                                                                          |                                                                                                                                                                                                                                                    |
|-----------------------------|-----------------------------------------------------------------------------------------------------------------------------------|------|----------------|---------------|----------------------|----------|-----------------------|-----------------------------------------------------------------------|---------------|------------------------------------------------------------------------------------------------------------------------------------------------------------------------------------------------------|--------------------------------------------------------------------------------------------------------------------------------------------------------------------------|--------------------------------------------------------------------------------------------------------------------------------------------------------------------------|----------------------------------------------------------------------------------------------------------------------------------------------------------------------------------------------------------------------------------------------------|
| Dutrieux <i>et al.</i> [38] | Correlation Between Cochlear Length, Insertion Angle, and Tonotopic Mismatch for MED-EL FLEX28 Electrode Arrays                   | 2022 | Europe, France | Retrospective | 106 cochleae (99 pz) | mean 63  | Severe to profound HL | Size of CDL:<br>Small <33.3mm<br>Medium 33.3-36.2mm<br>Large > 36.2mm | Uni/Bilateral | To investigate the relationship between cochlear length, insertion angle, and tonotopic mismatch and to compare the tonotopic mismatches with respect to the spiral ganglion and the organ of Corti. | Cochlear diameter (A-value)<br>CDL<br>AID                                                                                                                                | Cochlear diameter (A-value)<br>CDL<br>AID                                                                                                                                | Small cochlea size corresponded to higher insertion angle. Tonotopic mismatch could be minimized preoperatively by choosing electrode arrays according to the individual cochlear morphology and postoperatively by appropriate frequency fitting. |
| Chen <i>et al.</i> [32]     | Cochlear Duct Length Calculation: Comparison Between Using Otoplan and Curved Multiplanar Reconstruction in Non malformed Cochlea | 2021 | China          | Retrospective | 68 cochleae (34 pz)  | 0,6-63,3 | /                     | /                                                                     | /             | To describe a new method to measure the cochlear parameters using Otoplan software, and to compare it with the traditional method using curved multiplanar                                           | Cochlear diameter (A-value)<br>Height of the cochlea (H-value)<br>Width of the cochlear base (B-value)<br>CDL<br>Depth of insertion<br>Frequency corresponding electrode | Cochlear diameter (A-value)<br>Height of the cochlea (H-value)<br>Width of the cochlear base (B-value)<br>CDL<br>Depth of insertion<br>Frequency corresponding electrode | Length, width, height, and CDL measured by Otoplan, showed no significant differences compared with measurements made by cMPR. CDL presented statistically significant                                                                             |



|                              |                                                                                                                                                                          |      |              |                   |                          |                                      |                                          |                                                          |                   |                                                                                                                          |                                                                                                               |                                                                |                                                                                                                                                                                                                        |
|------------------------------|--------------------------------------------------------------------------------------------------------------------------------------------------------------------------|------|--------------|-------------------|--------------------------|--------------------------------------|------------------------------------------|----------------------------------------------------------|-------------------|--------------------------------------------------------------------------------------------------------------------------|---------------------------------------------------------------------------------------------------------------|----------------------------------------------------------------|------------------------------------------------------------------------------------------------------------------------------------------------------------------------------------------------------------------------|
|                              |                                                                                                                                                                          |      |              |                   |                          |                                      |                                          |                                                          |                   | reconstructi<br>on (cMPR).                                                                                               |                                                                                                               |                                                                | differences<br>between<br>male and<br>female<br>patients.<br>Measureme<br>nts using<br>Otoplan<br>presented<br>better<br>repeatabilit<br>y and are<br>much rapid.                                                      |
| Lee <i>et al.</i> [49]       | Modiolar Proximity of Slim Modiolar Electrodes and Cochlear Duct Length: Correlation for Potential Basis of Customized Cochlear Implantation With Perimodiolar Electrode | 2021 | South Korea  | Retrospect<br>ive | 51 cochle<br>a (38 pz)   | 7-91                                 | Congenital deafness Postlingual deafness | Congenital vs deafness Modiolar proximity: less vs tight | Unilatera<br>l    | To evaluate individual CDL to determine if there is any significant correlation of CDL with degree of modiolar proximity | Cochlear diameter (A-value)<br>Height of the cochlea (H-value)<br>Width of the cochlear base (B-value)<br>CDL | Relationships between cochlear parameters and spiral diameters | A preponderance of less modiolar proximity of the electrode exclusively among congenital deafness cases. Shorter CDL is associated with a less tight spiral configuration of slim modiolar electrodes postoperatively. |
| Aljazeera <i>et al.</i> [12] | Anatomy-based frequency allocation in cochlear implantation: the                                                                                                         | 2022 | Saudi Arabia | Retrospect<br>ive | 169 cochle<br>a (102 pz) | mean 7 (+-10) range:10 month-74years | /                                        | default frequency setting avs anatomy based frequency    | Uni/Bilat<br>eral | This study aimed to compare the predicted anatomy-based                                                                  | Cochlear diameter (A-value)<br>Height of the cochlea (H-value)<br>Width of the                                | Frequency-to-place mismatch                                    | The anatomy-based frequency allocation of each electrode is                                                                                                                                                            |

|                            |                                                                                                                      |      |                          |               |                      |              |   |                                                               |            |                                                                                                             |                                                                                                               |                                                       |                                                                                                                                                      |
|----------------------------|----------------------------------------------------------------------------------------------------------------------|------|--------------------------|---------------|----------------------|--------------|---|---------------------------------------------------------------|------------|-------------------------------------------------------------------------------------------------------------|---------------------------------------------------------------------------------------------------------------|-------------------------------------------------------|------------------------------------------------------------------------------------------------------------------------------------------------------|
|                            | importance of cochlear coverage                                                                                      |      |                          |               |                      |              |   | reallocation                                                  |            | frequency allocation of cochlear implant electrodes with the default standard frequencies.                  | cochlear base (B-value) CDL                                                                                   |                                                       | significantly different from the default frequency setting. This frequency-to-place mismatch was affected mainly by the cochlear coverage.           |
| Paouris <i>et al.</i> [36] | Validation of Automatic Cochlear Measurement using OTOPLAN software                                                  | 2023 | Slovakia                 | Retrospective | 109 cochlear (56 pz) | 7,3 (+- 3,7) | / | Measured manually vs. measure with AUTO                       | /          | To evaluate the new automatic measurement method                                                            | Cochlear diameter (A-value)<br>Height of the cochlea (H-value)<br>Width of the cochlear base (B-value)<br>CDL | Difference in CDL measurement and in measurement time | There wasn't a significant difference in measurement of Cochlear parameters; Time needed to perform the measurements was reduced from 7 min to 1min. |
| Dillon <i>et al.</i> [55]  | Effect of Place-Based Versus Default mapping Procedures on Masked Speech Recognition: simulation of Cochlear Implant | 2021 | United States of America | Prospective   | 25 pz                | 18-25        | / | Default filter frequencies vs. place-based filter frequencies | Unilateral | Compare performance with default maps vs. experimental place-based map, in participants with normal hearing | AID Estimate cochlear place frequency for each electrode                                                      | Sentence recognition                                  | Better performance with the place-based maps than for the default maps for both the CI-alone and EAS simulation.                                     |

|                            |                                                                                                            |      |         |               |       |       |                      |   |            |                                                                                                                                                                                        |                                                                    |                                                                                                                                                           |                                                                                                                                                                                                                                                                                                                                                |
|----------------------------|------------------------------------------------------------------------------------------------------------|------|---------|---------------|-------|-------|----------------------|---|------------|----------------------------------------------------------------------------------------------------------------------------------------------------------------------------------------|--------------------------------------------------------------------|-----------------------------------------------------------------------------------------------------------------------------------------------------------|------------------------------------------------------------------------------------------------------------------------------------------------------------------------------------------------------------------------------------------------------------------------------------------------------------------------------------------------|
|                            | Alone and Electric-Acoustic Stimulatio.                                                                    |      |         |               |       |       |                      |   |            |                                                                                                                                                                                        |                                                                    |                                                                                                                                                           | Adding acoustic low-frequency information resulted in a similar benefit for both maps.                                                                                                                                                                                                                                                         |
| Mertens <i>et al.</i> [54] | The smaller the frequency-to-place mismatch the better the hearing outcomes in cochlear implant recipients | 2022 | Belgium | Retrospective | 39 pz | 17-81 | Postlingual deafness | / | Unilateral | To investigate the effect of frequency-to-place mismatch; investigating if there is any correlation between AID and CDL, and which is the mean deviation of the default frequency map. | AID<br>CDL<br>Estimate cochlear place frequency for each electrode | Speech perception<br>Correlation between frequency-to-place mismatch and speech perception AID<br>Correlation between AID and CDL<br>Mean frequency shift | Significant linear correlation between the frequency-to-place mismatch and speech perception in noise 6 months after CI. The smaller the frequency-to-place mismatch, the better the initial speech perception in noise. The significant effect disappeared after 12 months. AID from 458° to 642°. mean of CDL 32,96. Correlation: 0,47; mean |

|                               |                                                                                                                                |      |                          |               |       |                |   |                                         |            |                                                                                                                                                                                                           |                                                                                   |                                                                     |                                                                                                                                                                                                      |
|-------------------------------|--------------------------------------------------------------------------------------------------------------------------------|------|--------------------------|---------------|-------|----------------|---|-----------------------------------------|------------|-----------------------------------------------------------------------------------------------------------------------------------------------------------------------------------------------------------|-----------------------------------------------------------------------------------|---------------------------------------------------------------------|------------------------------------------------------------------------------------------------------------------------------------------------------------------------------------------------------|
|                               |                                                                                                                                |      |                          |               |       |                |   |                                         |            |                                                                                                                                                                                                           |                                                                                   |                                                                     | frequency shift: from 1,03 to 1,44.                                                                                                                                                                  |
| Mertens <i>et al.</i> [34]    | Prediction of the Cochlear Implant Electrode Insertion Depth: Clinical Applicability of two Analytical Cochlear Models ( 2020) | 2020 | Belgium                  | Retrospective | 46 pz | mean 56 (6-81) | / | pre-operative AID vs post-operative AID | unilateral | To compare the clinical applicability of the Escudè and ECA formula using OTOPLAN to predict the AID; to compare the AID calculated with OTOPLAN to the prediction based upon a two-dimensional CT image. | Cochlear diameter (A-value)<br>Width of the cochlear base (B-value)<br>CDL<br>AID | Intra- and Inter-observer agreement<br>Validation of AID prediction | The use of a new planning software taht allows three-dimensional handling, integrating the diameter and width of the basal turn (ECA formula), resulted in the most accurate predictions of the AID. |
| Canfarotta <i>et al.</i> [50] | Incidence of Complete Insertion in Cochlear Implant Recipients of Long Lateral Wall Arrays                                     | 2020 | United States of America | Retrospective | 51 pz | 23-87          | / | complete insertion vs partial inserion  | Unilateral | To investigate the incidence of complete insertions among patients implanted with 31,5 mm flexible arrays and whether complete insertion is                                                               | Cochlear diameter (A-value)<br>Width of the cochlear base (B-value)<br>CDL        | Partial insertion rate<br>AID<br>CDL                                | Complete insertion of a 31.5 mm flexible array is feasible in most cases and does not appear to be limited by the range of CDL.                                                                      |

|                                 |                                                                                                                                                                                |      |                          |               |       |              |                      |                                                      |            |                                                                                                                                                     |                                                                            |                                                                        |                                                                                                                                                                                                                                                                          |
|---------------------------------|--------------------------------------------------------------------------------------------------------------------------------------------------------------------------------|------|--------------------------|---------------|-------|--------------|----------------------|------------------------------------------------------|------------|-----------------------------------------------------------------------------------------------------------------------------------------------------|----------------------------------------------------------------------------|------------------------------------------------------------------------|--------------------------------------------------------------------------------------------------------------------------------------------------------------------------------------------------------------------------------------------------------------------------|
|                                 |                                                                                                                                                                                |      |                          |               |       |              |                      |                                                      |            | limited by cochlear duct length.                                                                                                                    |                                                                            |                                                                        |                                                                                                                                                                                                                                                                          |
| Müller-Griff <i>et al.</i> [29] | Implementation of the secondary reconstructions of flat-panel volume computed tomography (fpVCT) and otological planning software for anatomically based cochlear implantation | 2022 | Germany                  | Retrospective | 30 pz | 57-64        | /                    | MSCT in non-implanted ear vs. MSCT in implanted ears | Unilateral | To investigate the combination of fpVCT and otological planning software to improve the implementation of anatomically based cochlear implantation. | Cochlear diameter (A-value)<br>Width of the cochlear base (B-value)<br>CDL | Comparison of CDL measurements                                         | The combination of fpVCT <sub>(seco)</sub> and OTOPLAN permits a simplified and more reliable analysis of the cochlea in the pre and postoperative setting. The combination of both systems will enable further progress in the development of an anatomically based CI. |
| Canfarotta <i>et al.</i> [46]   | Influence of Age at Cochlear Implantation and Frequency-to-place Mismatch on Early Speech                                                                                      | 2019 | United States of America | Retrospective | 48 pz | 67,4 (42-95) | Postlingual deafness | /                                                    | Unilateral | To investigate the influence of mismatch and age at implantation on speech recognition within the initial 6                                         | AID<br>Spiral ganglion place frequency                                     | AID<br>Frequency-to-place mismatch<br>Postoperative Speech Recognition | Younger adult CI recipients experienced more rapid growth in speech recognition during the initial 6 months                                                                                                                                                              |

|                          |                                                                                              |      |         |             |       |   |   |                                                                                               |            |                                                                                                                                                                    |                                                                                                               |     |                                                                                                                                                                                                |
|--------------------------|----------------------------------------------------------------------------------------------|------|---------|-------------|-------|---|---|-----------------------------------------------------------------------------------------------|------------|--------------------------------------------------------------------------------------------------------------------------------------------------------------------|---------------------------------------------------------------------------------------------------------------|-----|------------------------------------------------------------------------------------------------------------------------------------------------------------------------------------------------|
|                          | Recognition in Adults                                                                        |      |         |             |       |   |   |                                                                                               |            | months of CI use.                                                                                                                                                  |                                                                                                               |     | post-activation. Greater degrees of frequency-to-place mismatch were associated with poorer performance, yet older listeners were not particularly susceptible to this effect.                 |
| Breitsprecher et al.[15] | CT imaging-based approaches to cochlear duct length estimation - a human temporal bone study | 2021 | Germany | Prospective | 20 pz | / | / | CDL using 3D reconstruction with a 3D software CDL using the A-value method CDL using OTOPLAN | Unilateral | To determine the most reliable radiological imaging method and imaging processing software for measuring CDL from clinical routine imaging and to predict the AID. | Cochlear diameter (A-value)<br>Height of the cochlea (H-value)<br>Width of the cochlear base (B-value)<br>CDL | CDL | All approaches would have led to an electrode choice of rather too short electrodes. Concerning treatment decisions based on CDL measurements, the OTOPLAN-based method has to be recommended. |

|                              |                                                                                       |      |                          |               |     |                                                  |                                                                                                                                               |                                 |   |                                                                                                                                                                                                                                                                                                                     |                                                                                                        |                                        |                                                                                                                                                    |
|------------------------------|---------------------------------------------------------------------------------------|------|--------------------------|---------------|-----|--------------------------------------------------|-----------------------------------------------------------------------------------------------------------------------------------------------|---------------------------------|---|---------------------------------------------------------------------------------------------------------------------------------------------------------------------------------------------------------------------------------------------------------------------------------------------------------------------|--------------------------------------------------------------------------------------------------------|----------------------------------------|----------------------------------------------------------------------------------------------------------------------------------------------------|
| Almuhawas <i>et al.</i> [35] | Age as a factor of growth in mastoid thickness and skull width                        | 2020 | Saudi Arabia             | Retrospective | 92  | <20years and >20 years (range 6months -79 years) | Normal; Inner ear malformation: hypoplasia , incomplete partition type I, II and III, enlarged vestibular aqueduct syndrome, ossified cochlea | normal cochlea vs malformed     | / | To understand the growth rate of mastoid thickness and skull width associated with the age for both normal and malformed inner-ear anatomy groups. Also, to determine if there is any mathematical relation between cochlear size as measured by the “A” value against the age, mastoid thickness, and skull width. | Mastoid thickness<br>Cochlear diameter (A-value)<br>Skull width                                        | Mastoid thickness<br>Skull width       | Mastoid thickness and skull width increased with age, while the cochlear size was independent of age, mastoid thickness, and the size of the skull |
| Andersen <i>et al.</i> [37]  | Segmentation of Temporal Bone Anatomy for Patient-Specific Virtual Reality Simulation | 2020 | United States of America | Retrospective | 9pz | 3 months - 12 years                              | /                                                                                                                                             | OTOPLAN vs. manual segmentation | / | To explore different approaches to segmentation of temporal bone surgical anatomy fo                                                                                                                                                                                                                                | Cochlear diameter (A-value)<br>Height of the cochlea (H-value)<br>Width of the cochlear base (B-value) | Segmented volumes<br>Segmentation time | The automated segmentation algorithm currently offers the most flexible and feasible approach.                                                     |

|                               |                                                                                   |      |              |               |          |   |                        |   |   |                                                                                                                                                                                                                               |                                                                                                                       |                                                                                                                       |                                                                                                                                                                                                                                                                                                                              |
|-------------------------------|-----------------------------------------------------------------------------------|------|--------------|---------------|----------|---|------------------------|---|---|-------------------------------------------------------------------------------------------------------------------------------------------------------------------------------------------------------------------------------|-----------------------------------------------------------------------------------------------------------------------|-----------------------------------------------------------------------------------------------------------------------|------------------------------------------------------------------------------------------------------------------------------------------------------------------------------------------------------------------------------------------------------------------------------------------------------------------------------|
|                               |                                                                                   |      |              |               |          |   |                        |   |   | patient-specific VR simulation.                                                                                                                                                                                               |                                                                                                                       |                                                                                                                       |                                                                                                                                                                                                                                                                                                                              |
| Dhanasingh <i>et al.</i> [30] | A novel three-step process for the identification of inner ear malformation types | 2022 | Saudi Arabia | Retrospective | 112 ears | / | Inner ear malformation | / | / | Visualizing inner-ear systematically in both cochlear view (oblique coronal plane) and in mid-modiolar section (axial plane) and following three sequential steps simplifies, identification of inner-ear malformation types. | Cochlear diameter (A-value)<br>Width of the cochlear base (B-value)<br>Angular turn of the LW<br>Mid-modiolar section | Cochlear diameter (A-value)<br>Width of the cochlear base (B-value)<br>Angular turn of the LW<br>Mid-modiolar section | The systematic application of the three-step process proposed in this study is a novel method in the identification of IEM types. The visualizing inner ear in both cochlear view and the mid-modiolar section enables to capture every key anatomical structure of the inner ear in the identification of anatomical types. |



|                       |                                                                                                                              |      |                          |               |          |                             |                                                                         |                                                                                                |            |                                                                                                                                                                                                                                      |                                                                                                          |                                                                                                                              |                                                                                                                                                                                                                                                                                                                   |
|-----------------------|------------------------------------------------------------------------------------------------------------------------------|------|--------------------------|---------------|----------|-----------------------------|-------------------------------------------------------------------------|------------------------------------------------------------------------------------------------|------------|--------------------------------------------------------------------------------------------------------------------------------------------------------------------------------------------------------------------------------------|----------------------------------------------------------------------------------------------------------|------------------------------------------------------------------------------------------------------------------------------|-------------------------------------------------------------------------------------------------------------------------------------------------------------------------------------------------------------------------------------------------------------------------------------------------------------------|
| Canfarotta et al.[48] | Insertion Depth and Cochlear Implant Speech Recognition Outcomes: A Comparative Study of 28- and 31.5-mm Lateral Wall Arrays | 2022 | United States of America | Retrospective | 75 pzs   | 65,0 (28mm) - 63,6 (31,5mm) | Unknown Meniere's Noise induced Usher's syndrome Temporal bone fracture | Array length: 28mm vs. 31.5mm                                                                  | Unilateral | To compare speech recognition outcomes between cochlear implant (CI) recipients of 28- and 31.5-mm lateral wall electrode arrays, and to characterize the relationship between angular insertion depth (AID) and speech recognition. | AID                                                                                                      | Consonant-nucleus-consonant (CNC) word recognition                                                                           | Cochlear implant recipients implanted with a 31.5-mm array experienced better speech recognition than those with a 28-mm array at 12 months post-activation. Deeper insertion of a lateral wall array appears to confer speech recognition benefit up to ~600°, with a plateau in performance observed thereafter |
| Li et al. [31]        | Analysis of Cochlear Parameters in Paediatric Inner Ears with Enlarged Vestibular Aqueduct and Patent Cochlea                | 2022 | China                    | Retrospective | 247 ears | 0.0-12.8                    |                                                                         | patent cochlea VS enlarged vestibular aqueduct VS enlarged vestibular aqueduct with incomplete |            | (a) assess the cochlear dimensions in Chinese paediatric CI candidates with fully developed patent cochleae and with                                                                                                                 | The A-value (diameter), B-value (width), and H-value (height) were measured using OTOPLAN (version 1.2). | different cochlear anatomies using CT images and 3D images in both axial and coronal view. Data were analysed as per side of | A significant difference was found for the A value and B value between the patent cochleae and EVA-only and between                                                                                                                                                                                               |

|                 |                                                                                                  |      |       |               |       |         |                                                                |                                                           |          |                                                                                                                                                           |                                                                   |                                                              |                                                                                                                                                                                                                                   |
|-----------------|--------------------------------------------------------------------------------------------------|------|-------|---------------|-------|---------|----------------------------------------------------------------|-----------------------------------------------------------|----------|-----------------------------------------------------------------------------------------------------------------------------------------------------------|-------------------------------------------------------------------|--------------------------------------------------------------|-----------------------------------------------------------------------------------------------------------------------------------------------------------------------------------------------------------------------------------|
|                 |                                                                                                  |      |       |               |       |         |                                                                | partition type II                                         |          | EVA using the OTOPLAN software (b) analyse the differences between side of the ear, sex, and type of malformation.                                        |                                                                   | the ear (left/right), sex, and type of malformation          | the patent cochleae and EVA with IP II. . The basal turn of the cochlea may be smaller in EVA cases than in the patent cochleae. Electrode selection should be adjusted accordingly                                               |
| Zhu et al. [45] | The effect of cochlear size on electrically evoked auditory brainstem responses in deaf children | 2023 | China | Retrospective | 75 pz | 0.67-18 | severe or profound bilateral sensorineural hearing loss (SNHL) | no inner ear malformations (IEMs) VS Mondini malformation | first CI | to investigate the relationship between cochlear size and auditory conduction function in deaf children with no IEMs and those with Mondini malformation. | Basal cochlear diameter, cochlear width, cochlear height and CDL, | Correlations between EABRs and cochlear sizes were analyzed. | The EABR thresholds and/or latencies were negatively correlated with the basal cochlear diameter, cochlear width and/or cochlear duct length in both patients without IEMs and those with Mondini malformation. A larger cochlear |

|  |  |  |  |  |  |  |  |  |  |  |  |  |  |                                                                         |
|--|--|--|--|--|--|--|--|--|--|--|--|--|--|-------------------------------------------------------------------------|
|  |  |  |  |  |  |  |  |  |  |  |  |  |  | size appears to be associated with better auditory conduction function. |
|--|--|--|--|--|--|--|--|--|--|--|--|--|--|-------------------------------------------------------------------------|
